# Supplementary material for: Tetrakaidecahedron-shaped Cu four-core supramolecule as novel high-performance electrode material for lithium-ion batteries
Source: Royal Society of Chemistry journal article supplement (doi:10.1039/d1cc05878a), 2022-01-01
Supplement: d1cc05878a1.pdf [file d1cc05878a1.pdf]

## Electronic supplementary information

### Tetrakaidecahedron-shaped Cu four-core supramolecular as novel high-performance electrode material for lithium-ion batteries

Xueli Chen,<sup>a</sup> Kongyao Chen,<sup>\*a</sup> Gaojie Li,<sup>a</sup> Chao Huang,<sup>a</sup> Yingying Zhang,<sup>a</sup> Yanling Feng,<sup>a</sup> Na Qin,<sup>a</sup> Jiahuan Luo,<sup>c</sup> Weihua Chen<sup>b</sup> and Liwei Mi<sup>\*a</sup>

<sup>a</sup> Center for Advanced Materials Research, Zhongyuan University of Technology, Zhengzhou 450007, P. R. China

<sup>b</sup> College of Chemistry and Molecular Engineering, Zhengzhou University, Zhengzhou 450001, P. R. China

<sup>c</sup> Department of Chemical and Environmental Engineering, Anyang Institute of Technology, Anyang, 455000, P. R. China

\*Corresponding author.

E-mail address: chenkongyao@zut.edu.cn, mlwzzu@163.com.

## 1. Experimental Section

### 1.1. Sample preparation

Cu-FCS was prepared by one-pot solvothermal reaction. Typically, 0.21 g CuCl<sub>2</sub>·2H<sub>2</sub>O was dissolved in 20 mL methanol, and 0.12 mL pyridine-3-carbaldehyde were added to the above solution, then 6 drops dichloromethane were added. The above solution was stirred and transferred to a 30 mL Teflon-sealed autoclave, then the autoclave was heated to 70°C and kept for 6 days. Finally a brown product was obtained.

### 1.2. Crystal data collection and refinement

The crystal data of Cu-FCS was attained by a Bruker D8 VENTURE diffractometer ( $\lambda=0.71073$  Å, Mo-K $\alpha$ ). The SAINT and SADABS program were carried out to control the restoring data and semiempirical absorption correction. The structure of Cu-FCS was carried out, and the structure formula is [Cu<sub>4</sub>(L)<sub>4</sub>( $\mu_4$ -O)Cl<sub>6</sub> L = pyridine-3-carbaldehyde]. The molecular formula is (C<sub>24</sub>H<sub>20</sub>Cl<sub>6</sub>Cu<sub>4</sub>N<sub>4</sub>O<sub>5</sub>). Detailed crystallographic data was displayed in **Table S1**.

### 1.3. Characterizations

Power X-ray diffraction (XRD) patterns were obtained by an X-ray powder diffractometer (Rigaku Ultima IV, Japan) using Cu-K $\alpha$  radiation with a scan rate of 10° min<sup>-1</sup>. The morphology was characterized by a scanning electron microscope (SEM, Zeiss Merlin Compact, Germany) equipped with an energy dispersive X-ray spectroscopy (EDS) system. Fourier transform infrared spectroscopy (FT-IR) was displayed by a spectrometer (Nicolet iS50, Thermo scientific) at room temperature. Cu-FCS was mixed with KBr at a weight ratio of 1:100, and the scan range is 400-4000 cm<sup>-1</sup>. Thermogravimetric analysis (TG) were characterized in N<sub>2</sub> atmosphere from 50°C to 800°C with a heating rate of 10°C min<sup>-1</sup> (NETZSCH TG209F1, Germany). X-ray photoelectron spectroscopy (XPS) analysis was performed by an energy spectrometer (Thermoscientific K-Alpha).

The chemical composition is measured by FT-IR (Fig. S2). The peak at  $572\text{ cm}^{-1}$  may belong to Cu-O.<sup>1</sup> The peak at  $1475\text{ cm}^{-1}$ ,  $1449\text{ cm}^{-1}$ ,  $1427\text{ cm}^{-1}$  belongs to pyridine rings.<sup>2</sup> The strong characteristic peak at  $1612\text{ cm}^{-1}$  may belong to asymmetric and symmetric stretching vibrations of C=O and C=N. Generally speaking, the chemical composition of Cu-FCCS coincides with its molecular formula.

According to the survey spectrum, the peaks prove the presence of Cu2p, C1s, N1s, O1s and Cl1s. In detail, the peaks at 952.5 eV and 932.7 eV can be attributed to Cu 2p<sub>1/2</sub> and Cu 2p<sub>3/2</sub> of Cu<sup>2+</sup>, which demonstrates the valence of Cu in Cu-FCS.<sup>3</sup> Similarly, the XPS spectrum of C can be divided into three peaks. The peak at 284.8 eV belongs to C-C bond of aldehyde group, the peak at 285.8 eV belongs to C-N bond in aldehyde group, and the peak at 288.1 eV belongs to C=O bond.<sup>4, 5</sup> Besides, the peak at 400.0 eV belongs to C-N bond in pyridine ring, the peak at 532.3 eV belongs to Cu-O bond in Cu clusters, and the peaks at 198.4 eV and 199.9 eV belong to Cu-Cl bond in Cu clusters, respectively.<sup>6, 7</sup>

when act as electrode materials for LIBs, thermal stabilities are very important for the application of supramoleculars, so the thermal stability of Cu-FCS is measured by TG (Fig. 1f). At first, no obvious mass loss is detected below 200°C, manifesting a good thermal stability of Cu-FCS. The following mass loss (55 wt%) from 200°C to 258°C may be attributed to the decomposition of organic ligands, and the mass loss (30 wt%) from 258°C to 640°C may be attributed to the further decomposition of Cu compounds.

#### 1.4. Electrochemical measurements

70 wt% Cu-FCS, 20 wt% acetylene black and 10 wt% polyvinylidene fluoride (PVDF) in N-methyl pyrrolidone (NMP) was mixed and ball-milled for 10 h, and the particle size Cu-FCS will be reduced to hundreds of nanometers. Then the slurry was coated on a Cu foil. The above foil was dried at 80°C for 12 h in vacuum drying oven, and punched into discs with diameters of 8 mm. The mass loading of Cu-FCS was  $2\sim3\text{ mg cm}^{-2}$ . Coin cells were assembled in an Ar-filled glovebox. For LIBs, Li foils were used as counter electrodes, 1 mol L<sup>-1</sup> LiPF<sub>6</sub> in ethylene carbonate/dimethyl carbonate/diethyl carbonate (EC/DMC/DEC 1:1:1 in volume) was used as the electrolyte, and Celgard 2400 films were used as separators. The cycling and rate performance were measured by a battery test system (CT 2001A, Land, Wuhan). The cyclic voltammetry (CV) test was performed by an electrochemistry workstation (Chenhua CHI660e, Shanghai) with a voltage range of 0.2~3.0 V. The electrochemical impedance spectra (EIS) were measured with a frequency range from 0.1 Hz to 100 kHz.

Some Cu-FCS crystals are milled into powder and weighed ( $m_{\text{Cu-FCS}}$ ). Then the powder is put into a measuring cylinder and dropped from a certain height to the tabletop. The above steps are repeated several times until the volume no longer decreases, then the volume is achieved ( $V_{\text{Cu-FCS}}$ ). The tap density of the powder is calculated from the mass and volume ( $\rho_{\text{Cu-FCS}}=1.43\pm0.05\text{ g cm}^{-3}$ ). After the cycle test, the mass capacity ( $C_m$ ) of Cu-FCS is achieved, and the volume specific capacity can be achieved according to the formula  $C_v=C_m*\rho_{\text{Cu-FCS}}$ .

FCS·

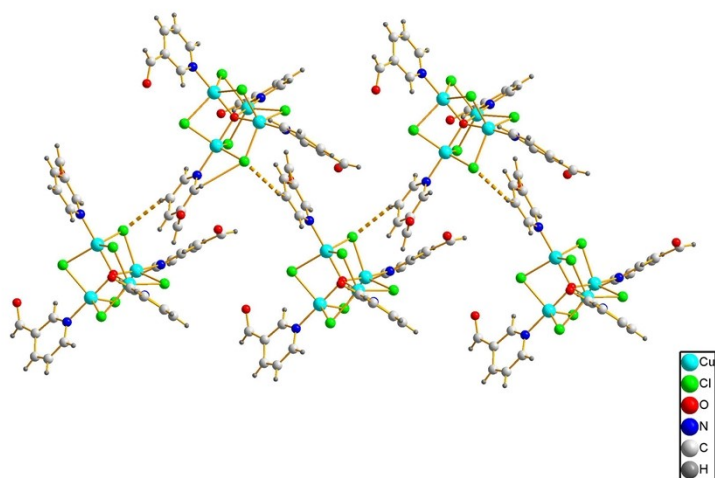

**Fig. S1** The stacking structure of Cu-FCS.

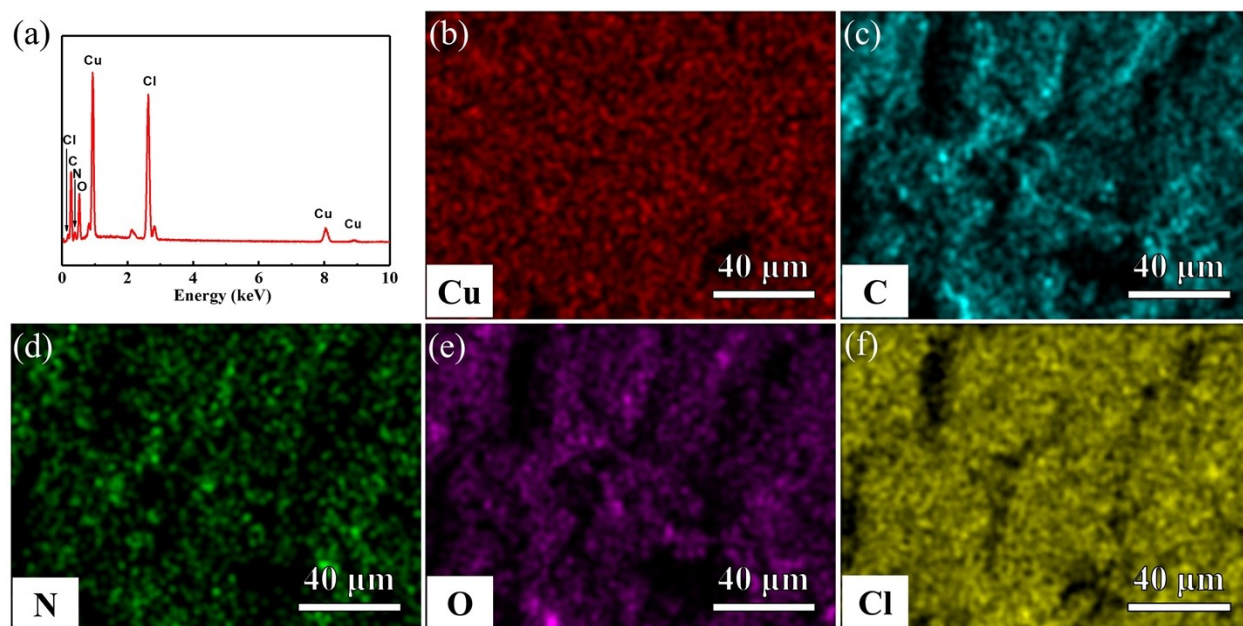

**Fig. S2** (a) EDS result of Cu-FCS. Element mapping of (b) Cu, (c) C, (d) N, (e) O and (f) Cl.

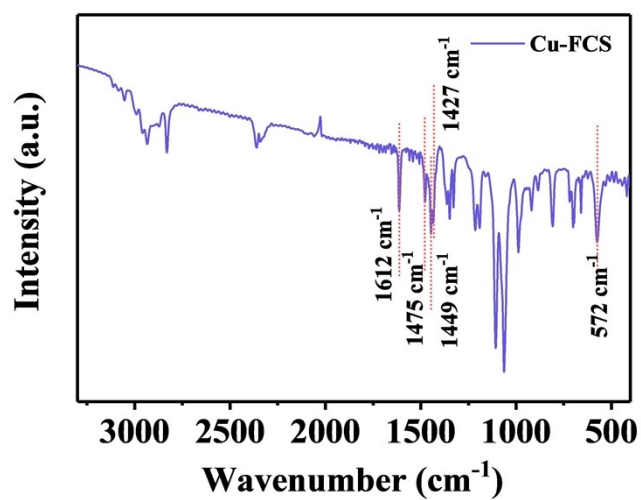

**Figure S3** FT-IR spectra of Cu-FCS.

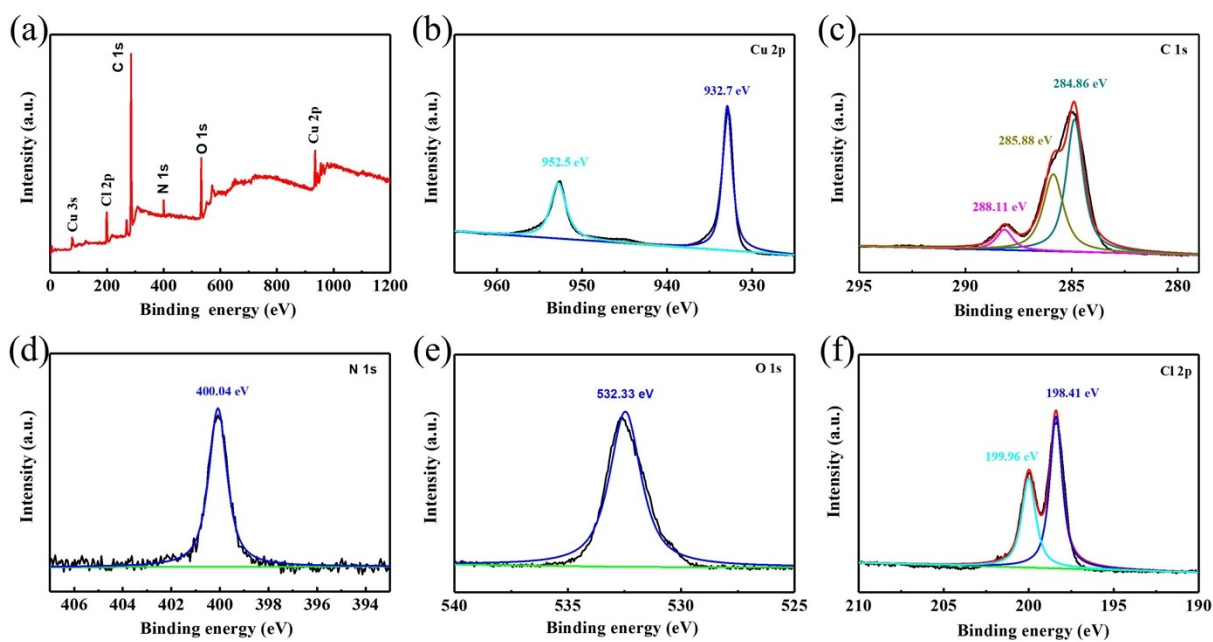

**Fig. S4** (a) XPS survey spectra of Cu-FCS. High-resolution XPS spectrums of (b) Cu, (c) C, (d) N, (e) O and (f) Cl.

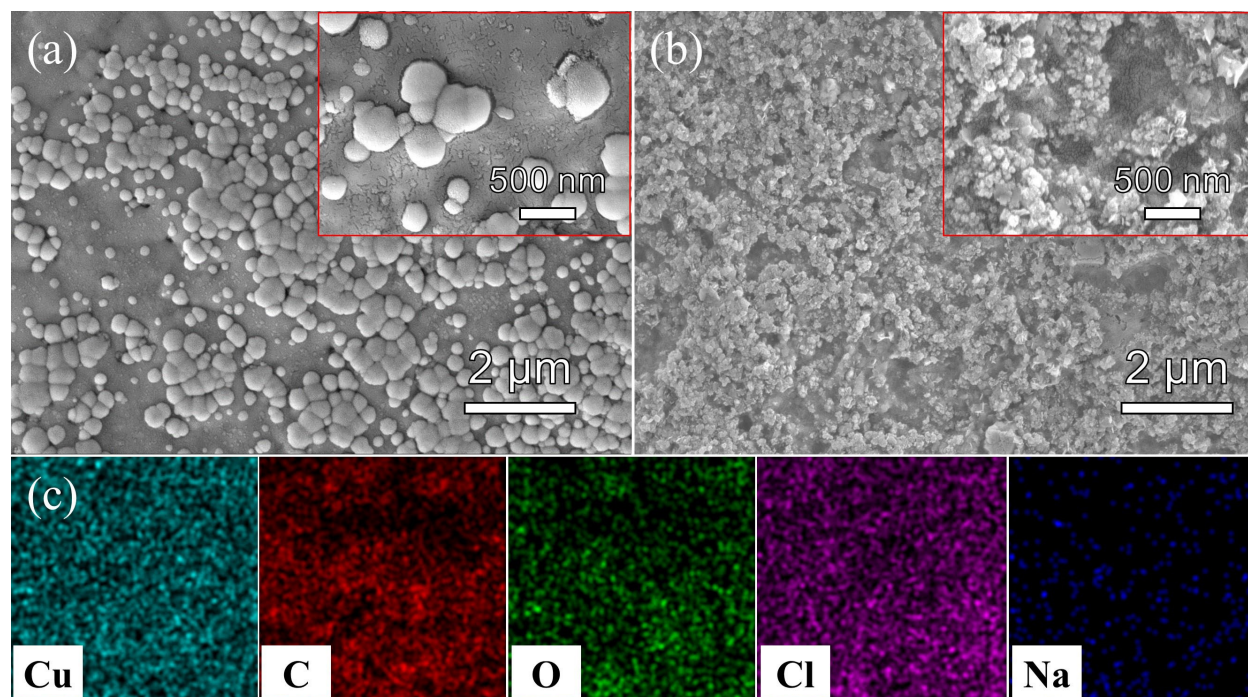

**Fig. S5** (a) The morphology of pristine Cu-FCS electrode. (b) The morphology of Cu-FCS electrode after cycle test. (c) Element distribution of Cu-FCS electrode after cycle test.

**Table S1.** Crystal datas and structural refinement parameters of Cu-FCS.

| Cu-FCS                                                                       |                                                                                               |
|------------------------------------------------------------------------------|-----------------------------------------------------------------------------------------------|
| Formula                                                                      | C <sub>24</sub> H <sub>20</sub> Cl <sub>6</sub> N <sub>4</sub> Cu <sub>4</sub> O <sub>5</sub> |
|                                                                              | 911.30                                                                                        |
| <i>T</i> / K                                                                 | 293                                                                                           |
| $\lambda$ / Å                                                                | 0.71073                                                                                       |
| Crystal system                                                               | Monoclinic                                                                                    |
| Space group                                                                  | <i>P</i> 2 <sub>1</sub> / <i>c</i>                                                            |
| <i>a</i> / Å                                                                 | 12.709 (9)                                                                                    |
| <i>b</i> / Å                                                                 | 12.889 (9)                                                                                    |
| <i>c</i> / Å                                                                 | 13.598 (8)                                                                                    |
| $\alpha$ / deg                                                               | 90                                                                                            |
| $\beta$ / deg                                                                | 91.23(2)                                                                                      |
| $\gamma$ / deg                                                               | 90                                                                                            |
| <i>V</i> / Å <sup>3</sup>                                                    | 2227 (2)                                                                                      |
| <i>Z</i>                                                                     | 2                                                                                             |
| $\rho_{\text{calc}}$ / g cm <sup>-3</sup>                                    | 1.359                                                                                         |
| $\mu$ / mm <sup>-1</sup>                                                     | 2.274                                                                                         |
| Reflections collected                                                        | 8286                                                                                          |
| Independent reflections                                                      | 7831                                                                                          |
| R(int)                                                                       | 0.0275                                                                                        |
| $\vartheta$ range / deg                                                      | 2.18 to 25.5                                                                                  |
| <i>F</i> (000)                                                               | 900                                                                                           |
| GOF on <i>F</i> <sup>2</sup>                                                 | 1.060                                                                                         |
| <i>R</i> <sub>1</sub> / <i>wR</i> <sub>2</sub> [ <i>I</i> > 2σ ( <i>I</i> )] | 0.0581 / 0.1807                                                                               |
| <i>R</i> <sub>1</sub> / <i>wR</i> <sub>2</sub> (all data)                    | 0.0606 / 0.1860                                                                               |

$$aR_1 = \sum ||F_0| - |F_c|| / \sum |F_0|, \quad {}^b wR_2 = [\sum w(F_0^2 - F_c^2)^2 / \sum w(F_0^2)^2]^{1/2}.$$

**Table S2.** Selected bond lengths (Å) and angles (°) of Cu-FCS.

| Cu-FCS     |           |              |            |              |            |
|------------|-----------|--------------|------------|--------------|------------|
| Cu1-O1     | 1.910(6)  | N2-Cu1-Cl4   | 95.0(3)    | Cl3-Cu3-Cl5  | 119.51(12) |
| Cu1-N2     | 2.007(9)  | Cl5-Cu1-Cl4  | 124.46(12) | Cl2-Cu3-Cl5  | 116.02(13) |
| Cu1-Cl5    | 2.388(3)  | O1-Cu1-Cl1   | 84.5(2)    | O1-Cu4-N3C   | 175.4(3)   |
| Cu1-Cl4    | 2.404(3)  | N2-Cu1-Cl1   | 96.2(3)    | O1-Cu4-Cl1   | 85.59(19)  |
| Cu1-Cl1    | 2.424(3)  | Cl5-Cu1-Cl1  | 113.99(12) | N3C-Cu4-Cl1  | 91.2(3)    |
| Cu2-O1     | 1.908(6)  | Cl4-Cu1-Cl1  | 119.30(12) | O1-Cu4-Cl2   | 85.36(19)  |
| Cu2-N1     | 1.986(9)  | O1-Cu2-N1    | 177.9(4)   | N3C-Cu4-Cl2  | 99.1(3)    |
| Cu2-Cl6A   | 2.365(3)  | O1-Cu2-Cl6A  | 85.6 (2)   | Cl1-Cu4-Cl2  | 121.32(12) |
| Cu2-Cl3    | 2.400(3)  | N1-Cu2-Cl6A  | 95.8(3)    | O1-Cu4-Cl6A  | 83.7(2)    |
| Cu2-Cl4    | 2.450(3)  | O1-Cu2-Cl3   | 84.8 (2)   | N3C-Cu4-Cl6A | 95.2(3)    |
| Cu3-O1     | 1.902(6)  | N1-Cu2-Cl3   | 93.1(3)    | Cl1-Cu4-Cl6A | 121.26(12) |
| Cu3-N4     | 1.994(9)  | Cl6A-Cu2-Cl3 | 123.12(13) | Cl2-Cu4-Cl6A | 115.08(13) |
| Cu3-Cl3    | 2.403(3)  | O1-Cu2-Cl4   | 83.70(18)  | Cu4-Cl1-Cu1  | 80.78(9)   |
| Cu3-Cl2    | 2.416(3)  | N1-Cu2-Cl4   | 96.8(3)    | Cu4-Cl2-Cu3  | 80.67(10)  |
| Cu3-Cl5    | 2.426(3)  | Cl6A-Cu2-Cl4 | 120.65(13) | Cu2-Cl3-Cu3  | 80.64(9)   |
| Cu4-O1     | 1.914(6)  | Cl3-Cu2-Cl4  | 113.73(12) | Cu1-Cl4-Cu2  | 80.65(9)   |
| Cu4-N3C    | 1.967(9)  | O1-Cu3-N4    | 179.3(4)   | Cu1-Cl5-Cu3  | 80.36(10)  |
| Cu4-Cl1    | 2.383(3)  | O1-Cu3-Cl3   | 84.8(2)    | Cu2-Cl6A-Cu4 | 81.18(10)  |
| Cu4-Cl2    | 2.387(3)  | N4-Cu3-Cl3   | 95.8(3)    | Cu3-O1-Cu1   | 109.1(3)   |
| Cu4-Cl6A   | 2.439(3)  | O1-Cu3-Cl2   | 84.8(2)    | Cu3-O1-Cu4   | 109.1(3)   |
| O1-Cu1-N2  | 179.2 (4) | N4-Cu3-Cl2   | 95.1(3)    | Cu1-O1-Cu4   | 109.1(3)   |
| O1-Cu1-Cl5 | 85.6(2)   | Cl3-Cu3-Cl2  | 121.99(12) | Cu3-O1-Cu2   | 109.3(3)   |
| N2-Cu1-Cl5 | 93.9(3)   | O1-Cu3-Cl5   | 84.7(2)    | Cu1-O1-Cu2   | 110.7(3)   |
| O1-Cu1-Cl4 | 84.91(19) | N4-Cu3-Cl5   | 94.8(3)    | Cu4-O1-Cu2   | 109.4(3)   |

Symmetry transformations used to generate equivalent atoms in copper cluster: <sup>1</sup>+X,1/2-Y,-1/2+Z;

<sup>2</sup>+X,1/2-Y,1/2+Z. **2:** <sup>1</sup>+X,3/2-Y,-1/2+Z; <sup>2</sup>+X,3/2-Y,1/2+Z.

**Table S3.** Electrochemical performance contrast between Cu-FCS and recent MOFs.

| Samples                                                            | Specific capacity<br>(mA h g <sup>-1</sup> ) | Cycle<br>(mA h g <sup>-1</sup> )                     | Rate<br>(mA h g <sup>-1</sup> )     | Voltage<br>(V) | Ref.      |
|--------------------------------------------------------------------|----------------------------------------------|------------------------------------------------------|-------------------------------------|----------------|-----------|
| [Co <sub>3</sub> (L <sub>1</sub> )(N <sub>3</sub> ) <sub>4</sub> ] | 617.0<br>(100 mA g <sup>-1</sup> )           | 358.0 after 200 cycles<br>(100 mA g <sup>-1</sup> )  | 346.0<br>(1000 mA g <sup>-1</sup> ) | 0.01~3.0       | 8         |
| Ni-MOFs                                                            | 842.0<br>(50 mA g <sup>-1</sup> )            | 620.0 after 100 cycles<br>(100 mA g <sup>-1</sup> )  | 229.0<br>(1000 mA g <sup>-1</sup> ) | 0.01~3.0       | 9         |
| NENU-507                                                           | 767.0<br>(200 mA g <sup>-1</sup> )           | 640.0 after 100 cycles<br>(100 mA g <sup>-1</sup> )  | 480.0<br>(500 mA g <sup>-1</sup> )  | 0.01~3.0       | 10        |
| Cu <sub>3</sub> (BET) <sub>2</sub>                                 | 740.0<br>(96 mA g <sup>-1</sup> )            | 474.0 after 50 cycles<br>(383 mA g <sup>-1</sup> )   | 644.0<br>(191 mA g <sup>-1</sup> )  | 0.05~3.0       | 3         |
| [Ni(4,4'-bpy)(tfbdc)(H <sub>2</sub> O) <sub>2</sub> ]              | 313.0<br>(100 mA g <sup>-1</sup> )           | 406.0 after 50 cycles<br>(50 mA g <sup>-1</sup> )    | 108.0<br>(1000 mA g <sup>-1</sup> ) | 0.01~3.0       | 11        |
| S-Co-MOF                                                           | 1107.0<br>(100 mA g <sup>-1</sup> )          | 601.0 after 700 cycles<br>(500 mA g <sup>-1</sup> )  | 604.0<br>(2000 mA g <sup>-1</sup> ) | 0.01~3.0       | 7         |
| Mn-1,4-BDC@200                                                     | 870.6<br>(100 mA g <sup>-1</sup> )           | 974.0 after 100 cycles<br>(100 mA g <sup>-1</sup> )  | 435.0<br>(1000 mA g <sup>-1</sup> ) | 0.01~3.0       | 12        |
| Co(L) MOF/RGO                                                      | 1805.5<br>(100 mA g <sup>-1</sup> )          | 1185.0 after 50 cycles<br>(100 mA g <sup>-1</sup> )  | 430.6<br>(2000 mA g <sup>-1</sup> ) | 0.01~3.0       | 13        |
| Cu-FCS                                                             | 1042.1<br>(100 mA g <sup>-1</sup> )          | 494.5 after 700 cycles<br>(1000 mA g <sup>-1</sup> ) | 459.4<br>(2000 mA g <sup>-1</sup> ) | 0.20~3.0       | This work |

**Table S4.** Equivalent circuit fitting results of Cu-FCS in LIBs.

| Name   | Value (ohm)            | Error (%) |
|--------|------------------------|-----------|
| Rs     | 1.818                  | 3.46      |
| Rct    | 173.800                | 2.96      |
| W1-R   | 4895.000               | 1.58      |
| W1-T   | 2.091                  | 6.92      |
| W1-P   | 0.705                  | 0.85      |
| CPE1-T | $1.982 \times 10^{-5}$ | 11.81     |
| CPE1-P | 0.793                  | 14.79     |

## References

- 1 X. Wang, X. Lu, L. Wu and J. Chen, *Biosens. Bioelectron.*, 2015, **65**, 295-301.
- 2 M. Rehakova, L. Fortunova, Z. Bastl, S. Nagyova, S. Dolinska, V. Jorik and E. Jona, *J Hazard. Mater.*, 2011, **186**, 699-706.
- 3 S. Maiti, A. Pramanik, U. Manju and S. Mahanty, *Microporous Mesoporous Mater.*, 2016, **226**, 353-359.
- 4 J. Hao, Y. Wang, C. Chi, J. Wang, Q. Guo, Y. Yang, Y. Li, X. Liu and J. Zhao, *Sustain. Energ. Fuels*, 2018, **2**, 2358-2365.
- 5 J. Gu, Y. Gu and S. Yang, *Chem. Commun.*, 2017, **53**, 12642-12645.
- 6 X. Zheng, Y. Li, Y. Xu, Z. Hong and M. Wei, *CrystEngComm*, 2012, **14**, 2112.
- 7 C. Li, X. Hu, X. Lou, L. Zhang, Y. Wang, J. P. Amoureux, M. Shen, Q. Chen and B. Hu, *J. Mater. Chem. A*, 2016, **4**, 16245-16251.
- 8 T. Gong, X. Lou, E. Q. Gao and B. Hu, *ACS Appl. Mater. Interfaces*, 2017, **9**, 21839-21847.
- 9 Y. Zhang, Y. B. Niu, T. Liu, Y. T. Li, M. Q. Wang, J. Hou and M. Xu, *Mater. Lett.*, 2015, **161**, 712-715.
- 10 Y. Y. Wang, M. Zhang, S. L. Li, S. R. Zhang, W. Xie, J. S. Qin, Z. M. Su and Y. Q. Lan, *Chem. Commun.*, 2017, **53**, 5204-5207.
- 11 C. Shi, X. Wang, Y. Gao, H. Rong, Y. Song, H. Liu and Q. Liu, *J. Solid State Electrochem.*, 2017, **21**, 2415-2423.
- 12 H. Hu, X. Lou, C. Li, X. Hu, T. Li, Q. Chen, M. Shen and B. Hu, *New J. Chem.*, 2016, **40**, 9746-9752.
- 13 C. Dong and L. Xu, *ACS Appl. Mater. Interfaces*, 2017, **9**, 7160-7168.
